# Supplementary material for: Ligand field theory, Pauli shields and ultra-covalency in organometallic chemistry
Source: Royal Society of Chemistry journal article supplement (doi:10.1039/d4cp00764f), 2024-01-01
Supplement: d4cp00764f1.pdf [file d4cp00764f1.pdf]

# Ligand Field Theory, Pauli Shields and Ultra-covalency in Organometallic Chemistry

Professor Robert J. Deeth

## Electronic Supporting Information

### S0: Free ion Term energies as functions of interelectron repulsion parameters

| Term symbol    | Racah           | Condon-Shortley                                       |
|----------------|-----------------|-------------------------------------------------------|
| <sup>3</sup> F | A – 8B          | F <sub>0</sub> – 8F <sub>2</sub> – 9F <sub>4</sub>    |
| <sup>3</sup> P | A + 7B          | F <sub>0</sub> + 7F <sub>2</sub> – 84F <sub>4</sub>   |
| <sup>1</sup> G | A + 4B + 2C     | F <sub>0</sub> + 4F <sub>2</sub> + F <sub>4</sub>     |
| <sup>1</sup> D | A – 3B + 2C     | F <sub>0</sub> – 3F <sub>2</sub> + 36F <sub>4</sub>   |
| <sup>1</sup> S | A + 14B +<br>7C | F <sub>0</sub> + 14F <sub>2</sub> + 224F <sub>4</sub> |

### S1: aiLFT protocol

Using the DFT-optimised geometry – BP86 functional; Grimme dispersion corrections (keyword `D3BJ`); def2-SVP on all atoms except the metal where def2-TZVP is used; CPCM solvation field – the aiLFT protocol is as follows.

Step 1: We start with a single-point BP86 spin-restricted or unrestricted SCF calculation (same basis set and solvation field as used for the geometry optimisation) to generate a set of starting orbitals. If the system is paramagnetic, a quasi-restricted set of orbitals is requested (keyword `UNO`).

Step 2: The (restricted, quasi or otherwise) valence orbitals are analysed to establish whether they already provide a suitable starting active space. That is, are there 5 mainly-d orbitals spanning the HOMO/LUMO gap? This is usually the case for weak-field systems towards the ionic extreme and almost never the case for stronger field, more covalent systems. If necessary then, a series of single-SCF-step calculations (keyword `NoIter`) are undertaken where the required mostly-d orbitals are rotated to lie around the HOMO/LUMO gap as required.

Step 3: An (n,5) CASSCF/NEVPT2 calculation is run with the `actorbs` flag set to `dorbs` in order to invoke the aiLFT procedure. Normally, the number and spin degeneracies of the roots are chosen to match the Russell-Saunders terms arising from the  $d^n$  configuration.

## S2: Cartesian coordinates in Å: S=0 unless otherwise stated

### [Fe(CO)<sub>6</sub>]<sup>2+</sup>: O<sub>h</sub>

|    |              |              |              |
|----|--------------|--------------|--------------|
| Fe | 0.000000000  | -0.000002000 | 0.000000000  |
| C  | 1.872078000  | 0.000004000  | -0.000892000 |
| C  | 0.000000000  | 1.875108000  | 0.000000000  |
| C  | -0.001966000 | -0.000005000 | 1.873676000  |
| C  | -1.872079000 | 0.000004000  | 0.000892000  |
| C  | 0.000000000  | -1.875111000 | 0.000000000  |
| C  | 0.001966000  | -0.000005000 | -1.873676000 |
| O  | 3.006296000  | 0.000010000  | -0.002564000 |
| O  | -0.000001000 | 3.009214000  | 0.000000000  |
| O  | -0.001889000 | -0.000005000 | 3.007867000  |
| O  | -3.006297000 | 0.000011000  | 0.002563000  |
| O  | 0.000000000  | -3.009217000 | 0.000000000  |
| O  | 0.001890000  | -0.000004000 | -3.007866000 |

### [Fe(CO)<sub>6</sub>]<sup>2+</sup>: C<sub>3v</sub>

|    |              |              |              |
|----|--------------|--------------|--------------|
| Fe | 0.000000000  | -0.000002000 | 0.000000000  |
| C  | 1.869858000  | 0.064926000  | 0.063982000  |
| C  | 0.062018000  | 1.873053000  | 0.062107000  |
| C  | 0.062142000  | 0.064205000  | 1.871545000  |
| C  | -1.869859000 | -0.064924000 | -0.063987000 |
| C  | -0.062018000 | -1.873056000 | -0.062107000 |
| C  | -0.062140000 | -0.064212000 | -1.871545000 |
| O  | 3.002770000  | 0.104266000  | 0.101615000  |
| O  | 0.099527000  | 3.005916000  | 0.099670000  |
| O  | 0.101025000  | 0.103072000  | 3.004403000  |
| O  | -3.002771000 | -0.104255000 | -0.101625000 |
| O  | -0.099528000 | -3.005919000 | -0.099670000 |
| O  | -0.101020000 | -0.103076000 | -3.004402000 |

### [Mn(CO)<sub>6</sub>]<sup>+</sup>: O<sub>h</sub>

|    |              |              |              |
|----|--------------|--------------|--------------|
| Mn | 0.000000000  | 0.000000000  | 0.000000000  |
| C  | 1.877708000  | 0.000000000  | 0.000000000  |
| C  | 0.000000000  | 0.000000000  | -1.877708000 |
| C  | 0.000000000  | 1.877708000  | 0.000000000  |
| C  | -1.877708000 | 0.000000000  | 0.000000000  |
| C  | 0.000000000  | 0.000000000  | 1.877708000  |
| C  | 0.000000000  | -1.877708000 | 0.000000000  |
| O  | 3.022947000  | 0.000000000  | 0.000000000  |
| O  | 0.000000000  | 0.000000000  | -3.022947000 |
| O  | 0.000000000  | 3.022947000  | 0.000000000  |
| O  | -3.022947000 | 0.000000000  | 0.000000000  |
| O  | 0.000000000  | 0.000000000  | 3.022947000  |
| O  | 0.000000000  | -3.022947000 | 0.000000000  |

**[Mn(CO)<sub>6</sub>]<sup>+</sup>: C<sub>3v</sub>**

|    |              |              |              |
|----|--------------|--------------|--------------|
| Mn | 0.000000000  | 0.000000000  | 0.000000000  |
| C  | -0.739827000 | 1.281418000  | 1.156032000  |
| C  | -1.479654000 | 0.000000000  | -1.156032000 |
| C  | -0.739827000 | -1.281418000 | 1.156032000  |
| C  | 0.739827000  | -1.281418000 | -1.156032000 |
| C  | 1.479654000  | 0.000000000  | 1.156032000  |
| C  | 0.739827000  | 1.281418000  | -1.156032000 |
| O  | -1.191057000 | 2.062972000  | 1.861112000  |
| O  | -2.382115000 | 0.000000000  | -1.861112000 |
| O  | -1.191057000 | -2.062972000 | 1.861112000  |
| O  | 1.191057000  | -2.062972000 | -1.861112000 |
| O  | 2.382115000  | 0.000000000  | 1.861112000  |
| O  | 1.191057000  | 2.062972000  | -1.861112000 |

**Cr(CO)<sub>6</sub>: O<sub>h</sub>**

|    |              |              |              |
|----|--------------|--------------|--------------|
| Cr | 0.000000000  | 0.000000000  | 0.000000000  |
| C  | 1.900047000  | 0.000001000  | 0.000100000  |
| C  | 0.000000000  | 1.900237000  | 0.000000000  |
| C  | -0.000107000 | -0.000001000 | 1.900103000  |
| C  | -1.900048000 | 0.000001000  | -0.000100000 |
| C  | -0.000001000 | -1.900236000 | 0.000000000  |
| C  | 0.000108000  | 0.000000000  | -1.900103000 |
| O  | 3.052922000  | 0.000001000  | -0.000047000 |
| O  | -0.000001000 | 3.053083000  | 0.000000000  |
| O  | 0.000087000  | -0.000001000 | 3.052987000  |
| O  | -3.052922000 | 0.000001000  | 0.000046000  |
| O  | -0.000001000 | -3.053083000 | 0.000001000  |
| O  | -0.000085000 | 0.000000000  | -3.052987000 |

**Cr(CO)<sub>6</sub>: C<sub>3v</sub>**

|    |              |              |              |
|----|--------------|--------------|--------------|
| Cr | 0.000000000  | 0.000000000  | 0.000000000  |
| C  | 1.497322000  | 0.000000000  | 1.169836000  |
| C  | -0.748661000 | -1.296719000 | 1.169836000  |
| C  | 0.748661000  | -1.296719000 | -1.169836000 |
| C  | -1.497322000 | 0.000000000  | -1.169836000 |
| C  | 0.748661000  | 1.296719000  | -1.169836000 |
| C  | -0.748661000 | 1.296719000  | 1.169836000  |
| O  | 2.405802000  | 0.000000000  | 1.879603000  |
| O  | -1.202901000 | -2.083486000 | 1.879603000  |
| O  | 1.202901000  | -2.083486000 | -1.879603000 |
| O  | -2.405802000 | 0.000000000  | -1.879603000 |
| O  | 1.202901000  | 2.083486000  | -1.879603000 |
| O  | -1.202901000 | 2.083486000  | 1.879603000  |

**[V(CO)<sub>6</sub>]<sup>-</sup>: O<sub>h</sub>**

|   |              |              |              |
|---|--------------|--------------|--------------|
| V | 0.000000000  | 0.000000000  | 0.000000000  |
| C | -1.954093000 | 0.000000000  | 0.000000000  |
| C | 0.000000000  | 0.000000000  | -1.954093000 |
| C | 0.000000000  | -1.954093000 | 0.000000000  |
| C | 1.954093000  | 0.000000000  | 0.000000000  |
| C | 0.000000000  | 0.000000000  | 1.954093000  |

|   |              |              |              |
|---|--------------|--------------|--------------|
| C | 0.000000000  | 1.954093000  | 0.000000000  |
| O | -3.127513000 | 0.000000000  | 0.000000000  |
| O | 0.000000000  | 0.000000000  | -3.127513000 |
| O | 0.000000000  | -3.127513000 | 0.000000000  |
| O | 3.127513000  | 0.000000000  | 0.000000000  |
| O | 0.000000000  | 0.000000000  | 3.127513000  |
| O | 0.000000000  | 3.127513000  | 0.000000000  |

**[V(CO)<sub>6</sub>]<sup>-</sup>: C<sub>3v</sub>**

|   |              |              |              |
|---|--------------|--------------|--------------|
| V | 0.000000000  | 0.000000000  | 0.000000000  |
| C | 1.539846000  | 0.000000000  | -1.203060000 |
| C | -0.769923000 | -1.333546000 | -1.203060000 |
| C | -0.769923000 | 1.333546000  | -1.203060000 |
| C | -1.539846000 | 0.000000000  | 1.203060000  |
| C | 0.769923000  | 1.333546000  | 1.203060000  |
| C | 0.769923000  | -1.333546000 | 1.203060000  |
| O | 2.464514000  | 0.000000000  | -1.925489000 |
| O | -1.232257000 | -2.134332000 | -1.925489000 |
| O | -1.232257000 | 2.134332000  | -1.925489000 |
| O | -2.464514000 | 0.000000000  | 1.925489000  |
| O | 1.232257000  | 2.134332000  | 1.925489000  |
| O | 1.232257000  | -2.134332000 | 1.925489000  |

**[Ti(CO)<sub>6</sub>]<sup>2-</sup>: O<sub>h</sub>**

|    |              |              |              |
|----|--------------|--------------|--------------|
| Ti | 0.000000000  | 0.000000000  | 0.000000000  |
| C  | 0.000000000  | 0.000000000  | 2.042569000  |
| C  | 0.000000000  | 2.042569000  | 0.000000000  |
| C  | -2.042569000 | 0.000000000  | 0.000000000  |
| C  | 0.000000000  | 0.000000000  | -2.042569000 |
| C  | 0.000000000  | -2.042569000 | 0.000000000  |
| C  | 2.042569000  | 0.000000000  | 0.000000000  |
| O  | 0.000000000  | 0.000000000  | 3.231090000  |
| O  | 0.000000000  | 3.231090000  | 0.000000000  |
| O  | -3.231090000 | 0.000000000  | 0.000000000  |
| O  | 0.000000000  | 0.000000000  | -3.231090000 |
| O  | 0.000000000  | -3.231090000 | 0.000000000  |
| O  | 3.231090000  | 0.000000000  | 0.000000000  |

**[Ti(CO)<sub>6</sub>]<sup>2-</sup>: C<sub>3v</sub>**

|    |              |              |              |
|----|--------------|--------------|--------------|
| Ti | 0.000000000  | 0.000000000  | 0.000000000  |
| C  | -0.804783000 | 1.393925000  | 1.257531000  |
| C  | -0.804783000 | -1.393925000 | 1.257531000  |
| C  | 1.609566000  | 0.000000000  | 1.257531000  |
| C  | 0.804783000  | -1.393925000 | -1.257531000 |
| C  | 0.804783000  | 1.393925000  | -1.257531000 |
| C  | -1.609566000 | 0.000000000  | -1.257531000 |
| O  | -1.273067000 | 2.205016000  | 1.989258000  |
| O  | -1.273067000 | -2.205016000 | 1.989258000  |
| O  | 2.546134000  | 0.000000000  | 1.989258000  |
| O  | 1.273067000  | -2.205016000 | -1.989258000 |
| O  | 1.273067000  | 2.205016000  | -1.989258000 |
| O  | -2.546134000 | 0.000000000  | -1.989258000 |

**[Cu (CF<sub>3</sub>)<sub>4</sub>]<sup>-</sup>**

|    |              |              |              |
|----|--------------|--------------|--------------|
| Cu | -0.001427000 | -0.001059000 | 0.000869000  |
| C  | -1.419680000 | 1.404616000  | -0.206299000 |
| C  | 1.404571000  | 1.417866000  | 0.202036000  |
| C  | -1.407666000 | -1.419135000 | 0.205701000  |
| C  | 1.417431000  | -1.407398000 | -0.197865000 |
| F  | -0.993614000 | 2.497884000  | -0.921580000 |
| F  | -2.519229000 | 0.967669000  | -0.904782000 |
| F  | -1.898189000 | 1.893943000  | 0.976383000  |
| F  | -2.503658000 | -0.992590000 | 0.916468000  |
| F  | -1.892651000 | -1.899975000 | -0.977832000 |
| F  | -0.972403000 | -2.517165000 | 0.907634000  |
| F  | 0.992954000  | -2.504611000 | -0.907954000 |
| F  | 1.895152000  | -1.890378000 | 0.987753000  |
| F  | 2.517304000  | -0.973153000 | -0.897562000 |
| F  | 2.499243000  | 0.994136000  | 0.916531000  |
| F  | 1.891702000  | 1.893417000  | -0.982750000 |
| F  | 0.968370000  | 2.519062000  | 0.898367000  |

**[Cu (CH<sub>3</sub>)<sub>4</sub>]<sup>-</sup>**

|    |              |              |              |
|----|--------------|--------------|--------------|
| Cu | 0.000000000  | 0.000000000  | 0.000000000  |
| C  | 1.410365000  | 1.410365000  | -0.006697000 |
| C  | 1.410365000  | -1.410365000 | 0.006697000  |
| C  | -1.410365000 | 1.410365000  | 0.006697000  |
| C  | -1.410365000 | -1.410365000 | -0.006697000 |
| H  | -1.075921000 | 2.355434000  | 0.489879000  |
| H  | 1.645179000  | 1.645179000  | 1.058005000  |
| H  | 1.645179000  | -1.645179000 | -1.058005000 |
| H  | -1.075921000 | -2.355434000 | -0.489879000 |
| H  | -1.645179000 | 1.645179000  | -1.058005000 |
| H  | -1.645179000 | -1.645179000 | 1.058005000  |
| H  | 2.355434000  | -1.075921000 | 0.489879000  |
| H  | 1.075921000  | 2.355434000  | -0.489879000 |
| H  | -2.355434000 | 1.075921000  | 0.489879000  |
| H  | -2.355434000 | -1.075921000 | -0.489879000 |
| H  | 1.075921000  | -2.355434000 | 0.489879000  |
| H  | 2.355434000  | 1.075921000  | -0.489879000 |

**[Zn (CF<sub>3</sub>)<sub>4</sub>]<sup>-</sup>**

|    |              |              |              |
|----|--------------|--------------|--------------|
| Zn | -0.000111000 | 0.000212000  | 0.000088000  |
| C  | -1.193156000 | -1.194210000 | 1.191616000  |
| C  | -1.191990000 | 1.194163000  | -1.193196000 |
| C  | 1.193144000  | -1.194113000 | -1.191287000 |
| C  | 1.191926000  | 1.194352000  | 1.192966000  |
| F  | -2.065220000 | -2.061476000 | 0.514488000  |
| F  | -0.514333000 | -2.066385000 | 2.057930000  |
| F  | -2.060031000 | -0.517467000 | 2.064783000  |
| F  | 2.061014000  | -0.517191000 | -2.063300000 |
| F  | 2.064206000  | -2.062452000 | -0.514247000 |
| F  | 0.514410000  | -2.065235000 | -2.058757000 |
| F  | 2.057826000  | 2.068239000  | 0.516346000  |

|   |              |             |              |
|---|--------------|-------------|--------------|
| F | 2.065012000  | 0.517243000 | 2.059607000  |
| F | 0.512942000  | 2.059720000 | 2.065900000  |
| F | -2.064613000 | 0.517013000 | -2.060262000 |
| F | -2.058281000 | 2.067903000 | -0.516895000 |
| F | -0.512746000 | 2.059684000 | -2.065781000 |

**[Ni (CF<sub>3</sub>)<sub>4</sub>]<sup>2-</sup>**

|    |              |              |              |
|----|--------------|--------------|--------------|
| Ni | -0.001427000 | -0.001059000 | 0.000869000  |
| C  | -1.419680000 | 1.404616000  | -0.206299000 |
| C  | 1.404571000  | 1.417866000  | 0.202036000  |
| C  | -1.407666000 | -1.419135000 | 0.205701000  |
| C  | 1.417431000  | -1.407398000 | -0.197865000 |
| F  | -0.993614000 | 2.497884000  | -0.921580000 |
| F  | -2.519229000 | 0.967669000  | -0.904782000 |
| F  | -1.898189000 | 1.893943000  | 0.976383000  |
| F  | -2.503658000 | -0.992590000 | 0.916468000  |
| F  | -1.892651000 | -1.899975000 | -0.977832000 |
| F  | -0.972403000 | -2.517165000 | 0.907634000  |
| F  | 0.992954000  | -2.504611000 | -0.907954000 |
| F  | 1.895152000  | -1.890378000 | 0.987753000  |
| F  | 2.517304000  | -0.973153000 | -0.897562000 |
| F  | 2.499243000  | 0.994136000  | 0.916531000  |
| F  | 1.891702000  | 1.893417000  | -0.982750000 |
| F  | 0.968370000  | 2.519062000  | 0.898367000  |

**[Ni (CN)<sub>4</sub>]<sup>2-</sup>**

|    |              |              |              |
|----|--------------|--------------|--------------|
| Ni | 0.000000000  | 0.000000000  | 0.000000000  |
| C  | 1.857673000  | 0.000001000  | 0.000091000  |
| C  | -1.857673000 | -0.000001000 | -0.000091000 |
| C  | 0.000001000  | 1.857893000  | 0.000000000  |
| C  | -0.000001000 | -1.857892000 | 0.000000000  |
| N  | 3.040481000  | 0.000002000  | -0.000055000 |
| N  | -3.040482000 | -0.000001000 | 0.000055000  |
| N  | 0.000002000  | 3.040720000  | 0.000000000  |
| N  | -0.000002000 | -3.040720000 | 0.000000000  |

**[Cu (CN)<sub>4</sub>]<sup>-</sup>**

|    |              |              |             |
|----|--------------|--------------|-------------|
| Cu | 0.000000000  | 0.000000000  | 0.000000000 |
| C  | 1.878960000  | 0.000000000  | 0.000000000 |
| C  | 0.000000000  | -1.878960000 | 0.000000000 |
| C  | -1.878960000 | 0.000000000  | 0.000000000 |
| C  | 0.000000000  | 1.878960000  | 0.000000000 |
| N  | 3.054937000  | 0.000000000  | 0.000000000 |
| N  | 0.000000000  | -3.054937000 | 0.000000000 |
| N  | -3.054937000 | 0.000000000  | 0.000000000 |
| N  | 0.000000000  | 3.054937000  | 0.000000000 |

**[Cu (CF<sub>3</sub>)<sub>3</sub> (bipy) ]**

|    |             |              |              |
|----|-------------|--------------|--------------|
| Cu | 0.268189000 | -0.415974000 | -0.178163000 |
| C  | 1.792135000 | -0.452148000 | 1.100831000  |
| F  | 2.650451000 | 0.597100000  | 1.012883000  |
| F  | 2.526533000 | -1.595904000 | 0.982577000  |

|   |              |              |              |
|---|--------------|--------------|--------------|
| F | 1.345695000  | -0.438685000 | 2.406011000  |
| C | 1.475916000  | 0.047007000  | -1.650430000 |
| F | 2.755492000  | -0.378216000 | -1.500990000 |
| F | 1.519493000  | 1.416055000  | -1.726886000 |
| F | 1.089439000  | -0.403473000 | -2.870727000 |
| C | -1.281629000 | -0.456313000 | -1.425891000 |
| F | -2.475481000 | -0.429953000 | -0.735206000 |
| F | -1.312036000 | -1.609262000 | -2.155138000 |
| F | -1.357924000 | 0.582097000  | -2.297870000 |
| C | -2.144554000 | 2.720134000  | 2.762726000  |
| H | -2.706711000 | 3.372097000  | 3.447763000  |
| C | -1.323833000 | 3.270132000  | 1.765718000  |
| H | -1.221260000 | 4.357736000  | 1.643274000  |
| C | -0.628002000 | 2.395300000  | 0.917461000  |
| H | 0.032617000  | 2.759000000  | 0.114627000  |
| N | -0.727996000 | 1.064988000  | 1.036082000  |
| C | -1.512575000 | 0.516752000  | 1.989434000  |
| C | -2.243093000 | 1.327129000  | 2.879699000  |
| H | -2.881279000 | 0.882547000  | 3.655054000  |
| C | -2.249175000 | -3.120545000 | 2.879123000  |
| H | -2.835156000 | -3.720903000 | 3.590678000  |
| C | -2.294113000 | -1.722038000 | 2.935658000  |
| H | -2.913792000 | -1.219337000 | 3.689663000  |
| C | -1.538093000 | -0.969734000 | 2.017685000  |
| N | -0.774255000 | -1.593788000 | 1.088001000  |
| C | -0.723938000 | -2.933572000 | 1.024912000  |
| H | -0.079791000 | -3.358833000 | 0.240622000  |
| C | -1.450496000 | -3.742914000 | 1.907299000  |
| H | -1.387030000 | -4.837144000 | 1.828748000  |

**Fe (Cp)<sub>2</sub>: D<sub>5h</sub>**

|    |              |              |              |
|----|--------------|--------------|--------------|
| Fe | 0.000000000  | 0.000000000  | 0.000000000  |
| C  | 0.378824000  | 1.165902000  | 1.633775000  |
| C  | 1.225902000  | 0.000000000  | -1.633775000 |
| C  | 1.225902000  | 0.000000000  | 1.633775000  |
| C  | -0.991775000 | 0.720567000  | 1.633775000  |
| C  | 0.378824000  | 1.165902000  | -1.633775000 |
| C  | 0.378824000  | -1.165902000 | -1.633775000 |
| C  | 0.378824000  | -1.165902000 | 1.633775000  |
| C  | -0.991775000 | -0.720567000 | 1.633775000  |
| C  | -0.991775000 | 0.720567000  | -1.633775000 |
| C  | -0.991775000 | -0.720567000 | -1.633775000 |
| H  | 0.717950000  | 2.209623000  | 1.612941000  |
| H  | 2.323335000  | 0.000000000  | -1.612941000 |
| H  | 2.323335000  | 0.000000000  | 1.612941000  |
| H  | -1.879618000 | 1.365622000  | 1.612941000  |
| H  | 0.717950000  | 2.209623000  | -1.612941000 |
| H  | 0.717950000  | -2.209623000 | -1.612941000 |
| H  | 0.717950000  | -2.209623000 | 1.612941000  |
| H  | -1.879618000 | -1.365622000 | 1.612941000  |
| H  | -1.879618000 | 1.365622000  | -1.612941000 |
| H  | -1.879618000 | -1.365622000 | -1.612941000 |

**Cr (C<sub>6</sub>H<sub>6</sub>)<sub>2</sub>: D<sub>6h</sub>**

|    |              |              |              |
|----|--------------|--------------|--------------|
| Cr | 0.000000000  | 0.000000000  | 0.000000000  |
| C  | 1.427753000  | 0.000000000  | 1.589558000  |
| H  | 2.527962000  | 0.000000000  | 1.529310000  |
| C  | 0.713896000  | 1.236425000  | 1.588541000  |
| H  | 1.264462000  | 2.188639000  | 1.526832000  |
| C  | -0.713896000 | 1.236425000  | 1.588541000  |
| H  | -1.264462000 | 2.188639000  | 1.526832000  |
| C  | -1.427753000 | 0.000000000  | 1.589558000  |
| H  | -2.527962000 | 0.000000000  | 1.529310000  |
| C  | -0.713896000 | -1.236425000 | 1.588541000  |
| H  | -1.264462000 | -2.188639000 | 1.526832000  |
| C  | 0.713896000  | -1.236425000 | 1.588541000  |
| H  | 1.264462000  | -2.188639000 | 1.526832000  |
| C  | 1.427753000  | 0.000000000  | -1.589559000 |
| H  | 2.527962000  | 0.000000000  | -1.529310000 |
| C  | 0.713896000  | 1.236425000  | -1.588541000 |
| H  | 1.264462000  | 2.188639000  | -1.526832000 |
| C  | -0.713896000 | 1.236425000  | -1.588541000 |
| H  | -1.264462000 | 2.188639000  | -1.526832000 |
| C  | -1.427753000 | 0.000000000  | -1.589559000 |
| H  | -2.527962000 | 0.000000000  | -1.529310000 |
| C  | -0.713896000 | -1.236425000 | -1.588542000 |
| H  | -1.264462000 | -2.188639000 | -1.526832000 |
| C  | 0.713896000  | -1.236425000 | -1.588541000 |
| H  | 1.264462000  | -2.188639000 | -1.526832000 |

**V (Cp)<sub>2</sub>: D<sub>5d</sub> S=3/2**

|   |              |              |              |
|---|--------------|--------------|--------------|
| V | 0.000000000  | 0.000000000  | 0.000000000  |
| C | 1.160191000  | -0.376969000 | 1.907557000  |
| C | 0.717037000  | -0.986917000 | -1.907557000 |
| C | 0.000000000  | -1.219897000 | 1.907557000  |
| C | 0.717037000  | 0.986917000  | 1.907557000  |
| C | 1.160191000  | 0.376969000  | -1.907557000 |
| C | -0.717037000 | -0.986917000 | -1.907557000 |
| C | -1.160191000 | -0.376969000 | 1.907557000  |
| C | -0.717037000 | 0.986917000  | 1.907557000  |
| C | 0.000000000  | 1.219897000  | -1.907557000 |
| C | -1.160191000 | 0.376969000  | -1.907557000 |
| H | 2.204286000  | -0.716216000 | 1.902708000  |
| H | 1.362323000  | -1.875077000 | -1.902708000 |
| H | 0.000000000  | -2.317723000 | 1.902708000  |
| H | 1.362323000  | 1.875077000  | 1.902708000  |
| H | 2.204286000  | 0.716216000  | -1.902708000 |
| H | -1.362323000 | -1.875077000 | -1.902708000 |
| H | -2.204286000 | -0.716216000 | 1.902708000  |
| H | -1.362323000 | 1.875077000  | 1.902708000  |
| H | 0.000000000  | 2.317723000  | -1.902708000 |
| H | -2.204286000 | 0.716216000  | -1.902708000 |

**Ni (Cp)<sub>2</sub>: D<sub>5h</sub> S=1**



|    |              |              |              |
|----|--------------|--------------|--------------|
| Ni | 0.000000000  | 0.000000000  | 0.000000000  |
| C  | -0.377152000 | -1.160754000 | -1.829592000 |
| H  | -0.716297000 | -2.204535000 | -1.825892000 |
| C  | -1.220489000 | 0.000000000  | -1.829592000 |
| H  | -2.317985000 | 0.000000000  | -1.825892000 |
| C  | -0.377152000 | 1.160754000  | -1.829592000 |
| H  | -0.716297000 | 2.204535000  | -1.825892000 |
| C  | 0.987396000  | 0.717385000  | -1.829592000 |
| H  | 1.875289000  | 1.362477000  | -1.825892000 |
| C  | 0.987396000  | -0.717385000 | -1.829592000 |
| H  | 1.875289000  | -1.362477000 | -1.825892000 |
| C  | -0.377152000 | -1.160754000 | 1.829592000  |
| H  | -0.716297000 | -2.204535000 | 1.825892000  |
| C  | -1.220489000 | 0.000000000  | 1.829592000  |
| H  | -2.317985000 | 0.000000000  | 1.825892000  |
| C  | -0.377152000 | 1.160754000  | 1.829592000  |
| H  | -0.716297000 | 2.204535000  | 1.825892000  |
| C  | 0.987396000  | 0.717385000  | 1.829592000  |
| H  | 1.875289000  | 1.362477000  | 1.825892000  |
| C  | 0.987396000  | -0.717385000 | 1.829592000  |
| H  | 1.875289000  | -1.362477000 | 1.825892000  |

**[Ni (Cp)<sub>2</sub>]<sup>2+</sup>: D<sub>5d</sub>**

|    |              |              |              |
|----|--------------|--------------|--------------|
| Ni | 0.000000000  | 0.000000000  | 0.000000000  |
| C  | 1.166448000  | -0.379002000 | 1.656697000  |
| C  | 0.720904000  | -0.992240000 | -1.656697000 |
| C  | 0.000000000  | -1.226476000 | 1.656697000  |
| C  | 0.720904000  | 0.992240000  | 1.656697000  |
| C  | 1.166448000  | 0.379002000  | -1.656697000 |
| C  | -0.720904000 | -0.992240000 | -1.656697000 |
| C  | -1.166448000 | -0.379002000 | 1.656697000  |
| C  | -0.720904000 | 0.992240000  | 1.656697000  |
| C  | 0.000000000  | 1.226476000  | -1.656697000 |
| C  | -1.166448000 | 0.379002000  | -1.656697000 |
| H  | 2.209428000  | -0.717887000 | 1.611874000  |
| H  | 1.365502000  | -1.879452000 | -1.611874000 |
| H  | 0.000000000  | -2.323130000 | 1.611874000  |
| H  | 1.365502000  | 1.879452000  | 1.611874000  |
| H  | 2.209428000  | 0.717887000  | -1.611874000 |
| H  | -1.365502000 | -1.879452000 | -1.611874000 |
| H  | -2.209428000 | -0.717887000 | 1.611874000  |
| H  | -1.365502000 | 1.879452000  | 1.611874000  |
| H  | 0.000000000  | 2.323130000  | -1.611874000 |
| H  | -2.209428000 | 0.717887000  | -1.611874000 |

**[NiF<sub>6</sub>]<sup>2-</sup>: O<sub>h</sub>**

|    |              |             |              |
|----|--------------|-------------|--------------|
| Ni | 0.000000000  | 0.000000000 | 0.000000000  |
| F  | -1.809821000 | 0.000000000 | 0.000000000  |
| F  | 0.000000000  | 0.000000000 | 1.809821000  |
| F  | 0.000000000  | 1.809821000 | 0.000000000  |
| F  | 1.809821000  | 0.000000000 | 0.000000000  |
| F  | 0.000000000  | 0.000000000 | -1.809821000 |

|   |             |              |             |
|---|-------------|--------------|-------------|
| F | 0.000000000 | -1.809821000 | 0.000000000 |
|---|-------------|--------------|-------------|

**[Fe(CN)<sub>6</sub>]<sup>3-</sup>: D<sub>4h</sub> S=1/2**

|    |              |              |              |
|----|--------------|--------------|--------------|
| Fe | 0.000000000  | 0.000000000  | 0.000000000  |
| C  | 0.000000000  | 0.000000000  | 1.918398000  |
| C  | 0.000000000  | 1.926837000  | 0.000000000  |
| C  | -1.926837000 | 0.000000000  | 0.000000000  |
| C  | 0.000000000  | 0.000000000  | -1.918398000 |
| C  | 0.000000000  | -1.926837000 | 0.000000000  |
| C  | 1.926837000  | 0.000000000  | 0.000000000  |
| N  | 0.000000000  | 0.000000000  | 3.094168000  |
| N  | 0.000000000  | 3.101754000  | 0.000000000  |
| N  | -3.101754000 | 0.000000000  | 0.000000000  |
| N  | 0.000000000  | 0.000000000  | -3.094168000 |
| N  | 0.000000000  | -3.101754000 | 0.000000000  |
| N  | 3.101754000  | 0.000000000  | 0.000000000  |

**[Fe(CN)<sub>6</sub>]<sup>-</sup>: O<sub>h</sub> S=3/2**

|    |              |              |              |
|----|--------------|--------------|--------------|
| Fe | 0.000000000  | 0.000000000  | 0.000000000  |
| C  | 1.921513664  | 0.000000000  | 0.000000000  |
| C  | 0.000000000  | 0.000000000  | 1.921513672  |
| C  | 0.000000000  | -1.921513664 | 0.000000000  |
| C  | -1.921513664 | 0.000000000  | 0.000000000  |
| C  | 0.000000000  | 0.000000000  | -1.921513672 |
| C  | 0.000000000  | 1.921513664  | 0.000000000  |
| N  | 3.095541831  | 0.000000000  | 0.000000000  |
| N  | 0.000000000  | 0.000000000  | 3.095541838  |
| N  | 0.000000000  | -3.095541831 | 0.000000000  |
| N  | -3.095541831 | 0.000000000  | 0.000000000  |
| N  | 0.000000000  | 0.000000000  | -3.095541838 |
| N  | 0.000000000  | 3.095541831  | 0.000000000  |

**[CrF<sub>6</sub>]<sup>-</sup>: D<sub>4h</sub> S=1/2**

|    |              |              |              |
|----|--------------|--------------|--------------|
| Cr | 0.000000000  | 0.000000000  | 0.000000000  |
| F  | 0.000000000  | 0.000000000  | 1.765137000  |
| F  | 0.000000000  | 1.792472000  | 0.000000000  |
| F  | -1.792472000 | 0.000000000  | 0.000000000  |
| F  | 0.000000000  | 0.000000000  | -1.765137000 |
| F  | 0.000000000  | -1.792472000 | 0.000000000  |
| F  | 1.792472000  | 0.000000000  | 0.000000000  |

### S3: Selected aiLFT and CLF analyses of selected ML<sub>4</sub> systems

DFT-optimised geometries (ESI S2) employed throughout.

#### [Cu(CF<sub>3</sub>)<sub>4</sub>]<sup>-</sup>

aiLFT CAS active space orbital energies: NB X and Y axes bisect C-Cu-C angles

| Orbital | Energy (eV) | Energy(cm-1) | dxy       | dyz       | dz2       | dxz       | dx2-y2    |
|---------|-------------|--------------|-----------|-----------|-----------|-----------|-----------|
| 1       | 0.000       | 0.0          | 0.001788  | -0.958033 | 0.004196  | 0.286616  | 0.001618  |
| 2       | 0.000       | 2.1          | 0.002130  | 0.286624  | 0.000857  | 0.958039  | -0.001370 |
| 3       | 0.139       | 1120.7       | 0.000020  | 0.003777  | 0.999990  | -0.002022 | 0.001164  |
| 4       | 0.246       | 1984.7       | 0.012653  | 0.001953  | -0.001169 | 0.000819  | 0.999917  |
| 5       | 4.788       | 38617.3      | -0.999916 | -0.001078 | 0.000014  | 0.002564  | 0.012653  |

AOM/CLF d-orbital energies (cm-1):  $e_{\sigma}(\text{CF}_3) = 12500$ ;  $e_{\sigma}(\text{void}) = -7000$ ;  $e_{\pi}(\text{void}) = -1400$  (NB Cu-C bonds aligned along X and Y axes.)

| E     | dz2     | dyz     | dxz     | dxy     | dx2-y2 |
|-------|---------|---------|---------|---------|--------|
| 36695 | -0.0000 | 0.0000  | 0.0000  | -0.0000 | 1.0000 |
| 0     | 0.0000  | -0.0000 | -0.0000 | 1.0000  | 0.0000 |
| -793  | 0.9992  | 0.0000  | 0.0000  | -0.0000 | 0.0000 |
| -1979 | -0.0000 | -0.2341 | 0.9722  | -0.0000 | 0.0000 |
| -1979 | 0.0000  | -0.9722 | -0.2341 | -0.0000 | 0.0000 |

aiLFT NEVPT2 active space orbital energies: NB X and Y axes bisect C-Cu-C angles

| Orbital | Energy (eV) | Energy(cm-1) | dxy       | dyz       | dz2       | dxz      | dx2-y2    |
|---------|-------------|--------------|-----------|-----------|-----------|----------|-----------|
| 1       | 0.000       | 0.0          | 0.012652  | 0.001932  | 0.000837  | 0.000595 | 0.999918  |
| 2       | 0.128       | 1032.3       | 0.001769  | -0.960306 | 0.004478  | 0.278901 | 0.001663  |
| 3       | 0.129       | 1036.9       | 0.002164  | 0.278909  | 0.000893  | 0.960314 | -0.001138 |
| 4       | 0.194       | 1563.9       | 0.000012  | -0.004050 | -0.999989 | 0.002107 | 0.000844  |
| 5       | 8.170       | 65897.8      | -0.999916 | -0.001070 | 0.000008  | 0.002579 | 0.012653  |

AOM/CLF d-orbital energies (cm-1):  $e_{\sigma}(\text{CF}_3) = 22450$ ;  $e_{\sigma}(\text{void}) = -9900$ ;  $e_{\pi}(\text{void}) = -200$  (NB X and Y axes bisect C-Cu-C angles.)

| E     | dz2     | dyz     | dxz     | dxy     | dx2-y2  |
|-------|---------|---------|---------|---------|---------|
| 65892 | -0.0000 | 0.0000  | -0.0000 | 1.0000  | 0.0000  |
| 1605  | -1.0000 | 0.0000  | 0.0000  | -0.0000 | 0.0000  |
| 1062  | 0.0000  | 0.3650  | 0.9310  | -0.0000 | -0.0000 |
| 1062  | -0.0000 | 0.9310  | -0.3650 | -0.0000 | 0.0000  |
| 0     | -0.0000 | -0.0000 | -0.0000 | 0.0000  | -1.0000 |

#### [Cu(CH<sub>3</sub>)<sub>4</sub>]<sup>-</sup>

aiLFT CAS active space orbital energies: NB X and Y axes bisect C-Cu-C angles

| Orbital | Energy (eV) | Energy(cm-1) | dxy       | dyz       | dz2       | dxz       | dx2-y2    |
|---------|-------------|--------------|-----------|-----------|-----------|-----------|-----------|
| 1       | 0.000       | 0.0          | 0.000004  | 0.999960  | -0.000001 | -0.008949 | -0.000000 |
| 2       | 0.000       | 0.0          | 0.000000  | 0.008949  | 0.000469  | 0.999960  | -0.000002 |
| 3       | 0.026       | 211.3        | -0.000000 | 0.000003  | -1.000000 | 0.000469  | 0.000007  |
| 4       | 0.490       | 3953.9       | 0.000000  | 0.000000  | 0.000007  | 0.000002  | 1.000000  |
| 5       | 5.062       | 40829.6      | 1.000000  | -0.000004 | -0.000000 | -0.000000 | -0.000000 |

aiLFT NEVPT2 active space orbital energies: NB X and Y axes bisect C-Cu-C angles

| Orbital | Energy (eV) | Energy(cm-1) | dxy       | dyz       | dz2      | dxz       | dx2-y2    |
|---------|-------------|--------------|-----------|-----------|----------|-----------|-----------|
| 1       | 0.000       | 0.0          | 0.000000  | 0.018795  | 0.000202 | -0.999823 | 0.000040  |
| 2       | 0.000       | 0.0          | -0.000005 | -0.999823 | 0.000005 | -0.018795 | 0.000001  |
| 3       | 0.184       | 1480.8       | 0.000000  | 0.000001  | 1.000000 | 0.000202  | -0.000027 |
| 4       | 0.376       | 3033.2       | 0.000000  | -0.000000 | 0.000027 | 0.000040  | 1.000000  |
| 5       | 8.930       | 72024.1      | -1.000000 | 0.000005  | 0.000000 | 0.000000  | 0.000000  |

#### [Ni(CF<sub>3</sub>)<sub>4</sub>]<sup>2-</sup>

| Orbital | Energy (eV) | Energy(cm-1) | dxy       | dyz      | dz2       | dxz       | dx2-y2    |
|---------|-------------|--------------|-----------|----------|-----------|-----------|-----------|
| 1       | 0.000       | 0.0          | -0.001628 | 0.928348 | -0.003599 | -0.371686 | -0.001684 |

|   |       |         |           |           |           |           |           |
|---|-------|---------|-----------|-----------|-----------|-----------|-----------|
| 2 | 0.000 | 0.5     | 0.001712  | 0.371689  | -0.000074 | 0.928355  | -0.001601 |
| 3 | 0.038 | 309.6   | -0.000012 | 0.003370  | 0.999993  | -0.001269 | 0.000300  |
| 4 | 0.280 | 2255.0  | 0.010205  | 0.002166  | -0.000306 | 0.000839  | 0.999945  |
| 5 | 2.955 | 23833.5 | -0.999945 | -0.000853 | -0.000010 | 0.002203  | 0.010205  |

**[Ni (CN)<sub>4</sub>]<sup>2-</sup>**

| Orbital | Energy (eV) | Energy(cm-1) | dxy       | dyz       | dz2       | dxz       | dx2-y2    |
|---------|-------------|--------------|-----------|-----------|-----------|-----------|-----------|
| 1       | 0.000       | 0.0          | -0.000261 | 0.999975  | -0.000005 | 0.007012  | -0.000001 |
| 2       | 0.000       | 0.3          | -0.000002 | 0.007012  | 0.000659  | -0.999975 | 0.000077  |
| 3       | 0.085       | 682.3        | -0.000000 | 0.000000  | -1.000000 | -0.000659 | -0.000027 |
| 4       | 0.208       | 1681.1       | -1.000000 | -0.000261 | 0.000000  | -0.000000 | 0.000000  |
| 5       | 3.544       | 28585.4      | 0.000000  | 0.000000  | -0.000027 | 0.000077  | 1.000000  |

AOM/CLF d-orbital energies relative to  $d_{xz}/d_{yz}$  at zero. (cm-1):  $e_{\sigma}(\text{CN}) = 8400$ ;  $e_{\pi}(\text{CN}) = -400$   
 $e_{\sigma}(\text{void}) = -5850$ ;  $e_{\pi}(\text{void}) = -1200*$  (NB Cu-C bonds aligned along X and Y axes. \* fixed assumed value)

| E     | dz2     | dyz     | dxz     | dxy     | dx2-y2 |
|-------|---------|---------|---------|---------|--------|
| 28400 | 0.0000  | 0.0000  | 0.0000  | 0.0000  | 1.0000 |
| 1600  | -0.0000 | 0.0000  | -0.0000 | 1.0000  | 0.0000 |
| 733   | -0.9996 | 0.0000  | -0.0000 | -0.0000 | 0.0000 |
| 0     | 0.0000  | -0.0000 | -1.0000 | -0.0000 | 0.0000 |
| 0     | 0.0000  | 1.0000  | -0.0000 | -0.0000 | 0.0000 |

**[Cu (CN)<sub>4</sub>]<sup>-</sup>**

| Orbital | Energy (eV) | Energy(cm-1) | dxy       | dyz       | dz2       | dxz       | dx2-y2    |
|---------|-------------|--------------|-----------|-----------|-----------|-----------|-----------|
| 1       | 0.000       | 0.0          | 0.000001  | 1.000000  | -0.000000 | 0.000000  | -0.000000 |
| 2       | 0.000       | 1.5          | 0.000000  | 0.000000  | 0.000187  | -1.000000 | 0.000007  |
| 3       | 0.073       | 589.6        | 0.000000  | -0.000000 | -1.000000 | -0.000187 | -0.000003 |
| 4       | 0.415       | 3343.4       | 1.000000  | -0.000001 | 0.000000  | 0.000000  | 0.000000  |
| 5       | 5.006       | 40376.6      | -0.000000 | 0.000000  | -0.000003 | 0.000007  | 1.000000  |
